# **A new pterosaur from Skye, Scotland and the early diversification of flying reptiles**

Elizabeth Martin-Silverstone<sup>1\*</sup>, David M. Unwin<sup>2</sup>, Andrew R. Cuff<sup>3</sup>, Emily E. Brown<sup>4,5</sup>,  
Lu Allington-Jones<sup>6</sup>, and Paul M. Barrett<sup>4</sup>

<sup>1</sup> School of Earth Sciences, University of Bristol, Life Sciences Building, 24 Tyndall  
Avenue, Bristol, BS8 1TQ, UK

<sup>2</sup> Museum Studies, University of Leicester, Museum Studies Building, 19 University  
Road, Leicester LE1 7RF, UK

<sup>3</sup> Human Anatomy Resource Centre, University of Liverpool, Sherrington Building,  
Ashton Street, Liverpool, L69 3GE, UK

<sup>4</sup> Department of Earth Sciences, Natural History Museum, Cromwell Road, London  
SW7 5BD, UK

<sup>5</sup> School of Geography, Earth & Environmental Sciences, University of Birmingham,  
Edgbaston, Birmingham, B15 2TT, UK

<sup>6</sup> Conservation Centre, Natural History Museum, Cromwell Road, London SW7 5BD,  
UK

\* email for correspondence: [liz.martin@bristol.ac.uk](mailto:liz.martin@bristol.ac.uk)

## Abstract

The Middle Jurassic was a critical time in pterosaur evolution, witnessing the inception of major morphological innovations that underpinned successive radiations by rhamphorhynchids, basal monofenestratans and pterodactyloids. Frustratingly, this interval is particularly sparsely sampled, with a record consisting almost exclusively of isolated fragmentary remains. Here, we describe new material from the Bathonian-aged Kilmaluag Formation of Skye, Scotland, which helps to close this gap. *REDACTED* (gen. et sp. nov.) is based on a three-dimensionally preserved partial skeleton, which represents the first associated Middle Jurassic pterosaur. *REDACTED* is one of the first pterosaurs to be fully digitally prepared and  $\mu$ CT scanning reveals multiple elements of the skeleton that remain fully embedded within the matrix, which are otherwise inaccessible. Novel anatomical features of this new Middle Jurassic pterosaur help to confirm the existence of the controversial clade Darwinoptera, greatly clarifying our understanding of Jurassic pterosaur evolution.

## 1. Introduction

The earliest known pterosaur fossils come from the Late Triassic, but the group persisted until the K-Pg extinction [1,2]. Pterosaurs are typically divided into three large groups: the basal, polyphyletic ‘rhamphorhynchoids’, which existed from the Norian; the derived pterodactyloids, which appeared in the Late Jurassic; and the basal monofenestratans that intervened between them from the Middle–Late Jurassic. Basal monofenestratans have been suggested to be a transitional, polyphyletic group leading to pterodactyloids [3,4] but the monophyly and relationships of these taxa (many referred to Wukongopteridae) are controversial [5,6].

Pterosaurs are known from every continent [2,7] and experienced two large peaks in species-richness: in the Early–‘middle’ Cretaceous and latest Cretaceous [8,9]. However, their distribution is highly affected by the ‘Lagerstätten effect’ and other forms of sampling bias [8–10]. The majority of pterosaur fossils have been collected from Konservat-Lagerstätten (deposits with exceptional preservation) and it has been demonstrated that times and places of high diversity track exceptional preservation potential [9,10]. For example, the Late Jurassic pterosaur record is dominated by Konservat-Lagerstätten such as the Solnhofen Limestones of Germany and the Daohugou Beds of China, which both yield nearly complete specimens, often with associated soft tissues [1,11,12]. Both of these faunas include pterodactyloids and basal non-pterodactyloids. The younger Early–‘middle’ Cretaceous is best known for areas such as the Konzentrat-Lagerstätten of the Cambridge Greensand (UK) [13], where hundreds of disarticulated and fragmentary pterodactyloid pterosaur bones have been found and several Konservat-Lagerstätten, including the Jehol Biota of China [14] and the Santana and Crato

Formations of Brazil, where complete skeletons of pterodactyloids have been recovered frequently [1,11]. As a result, almost all of our knowledge of pterosaur evolutionary history is based on material from a handful of sites with restricted spatiotemporal coverage.

The Middle Jurassic pterosaur fossil record is exceptionally poor. The Stonesfield Slate (UK) provides the best example but, although abundant pterosaur material has been found, all of it is disarticulated, isolated and often fragmentary, making estimates of diversity and anatomical description difficult [15]. Recent studies have proposed that other potentially Middle Jurassic pterosaur-bearing localities, such as the Tiaojishan Formation (China), are Late Jurassic instead [16].

The scarcity of Middle Jurassic pterosaur-bearing formations and diagnosable taxa from this period are problematic when attempting to understand early pterosaur evolution. Pterosaur phylogenies suggest that Monofenestrata and Pterodactyloidea both diverged during this interval, but direct evidence for the timing of these events remains elusive. For these reasons, any new Middle Jurassic pterosaur material, especially significantly complete skeletons, are important in constraining the spatiotemporal context and evolutionary mode of the pterosaur radiation. Here, we describe a new three-dimensionally preserved partial skeleton from the Middle Jurassic (Bathonian: ~168–166 million years ago) of the Isle of Skye, Scotland, which is the first associated pterosaur discovered in Scotland and the most complete Middle Jurassic pterosaur found to date.

## 2. Material and Methods

Due to the fragility of the bones and the hardness of the surrounding matrix, traditional mechanical preparation was difficult and the specimen was partially

prepared using acetic acid (see Supplementary Material). In order to visualize more details of the specimen, including elements that remain fully encased in matrix, microcomputed tomography ( $\mu$ CT) scanning of the specimen was performed at the University of Bristol X-Ray Tomography Facility and segmented using Avizo Lite 9.5 (see Supplementary Material for details).

The specimen was scored into a new pterosaur data matrix, consisting of 65 taxa and 137 characters, and a phylogenetic analysis was performed in TNT (see Supplementary Material for more details).

### 3. Systematic Palaeontology

PTEROSAURIA Kaup, 1834

MONOFENESTRATA Lü et al., 2010

DARWINOPTERA Andres et al., 2014

*REDACTED* gen. et sp. nov.

Holotype. NHMUK PV R37110, an associated partial skeleton consisting of several vertebrae, a sternum with cristospine, a partial right pelvis, a complete right scapulocoracoid, a partial left ulna, a proximal syncarpal, a distal syncarpal, two metacarpal IVs, several digit IV phalanx fragments, a proximal femur fragment, and numerous other long bone and unidentifiable fragments (Fig. 1).

Type locality and horizon. The holotype was found in 2006 by a team from the Natural History Museum (led by PMB), at Cladach a'Ghlinne, north of Elgol, Isle of Skye, Scotland, UK, and comes from the Bathonian-aged Kilmaluag Formation (see Supplementary Fig. 1 and [17–19]).

Etymology. [SECTION REDACTED FOR PREPRINT]

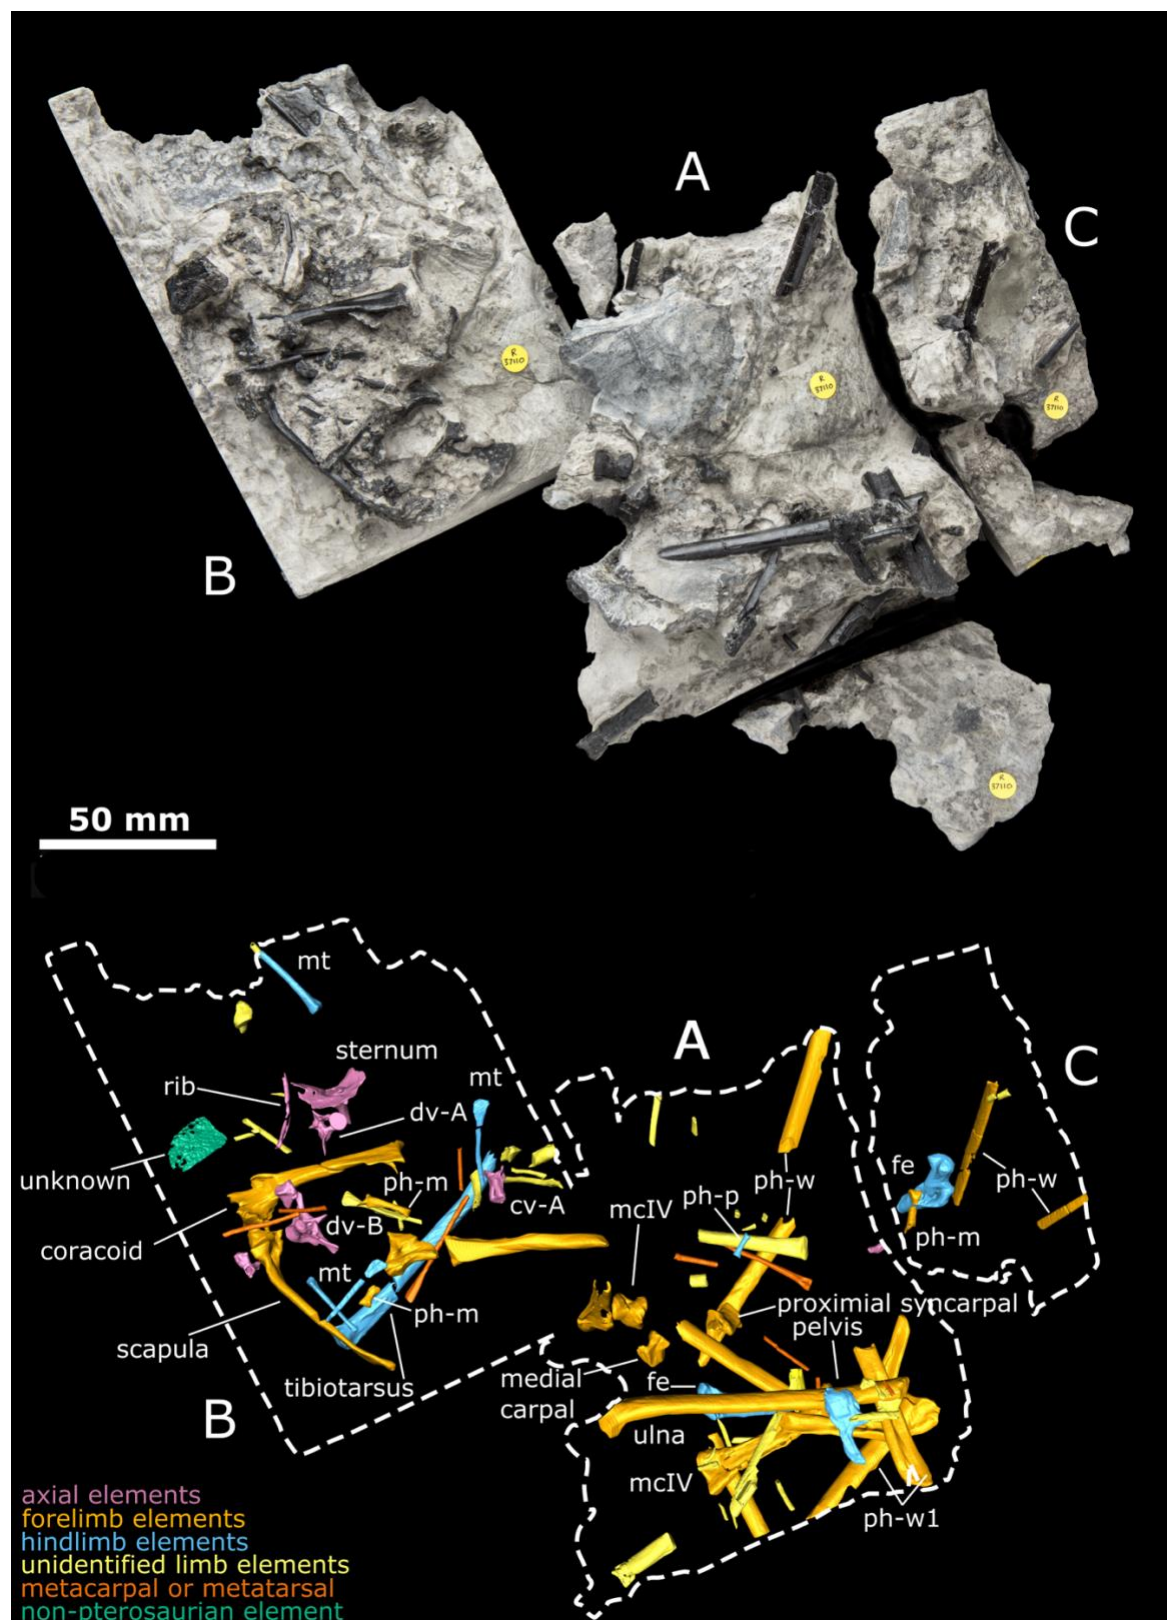

Figure 1: NHMUK PV R37110, REDACTED, approximately as it was found (top) and by CT reconstruction with elements (bottom). Letters indicate the blocks as discussed in the text. Abbreviations: cv/dv, cervical/dorsal vertebra; fe, femur; m, manual; mc, metacarpal; mt, metatarsal, p, pedal; ph, phalanx; w, wing.

Diagnosis. Darwinopteran pterosaur (fig. 2) that differs from other darwinopterans by the presence of sternocoracoid articulations lying anterior and posterior to one another, and with a cristospine that is short and deep. *REDACTED* is further diagnosed by a single autapomorphy, the uniquely shaped end of the coracoid with an articular surface for sternal articulation.

#### 4. Results

A more detailed description can be found in the Supplementary Material, but here we note the key anatomical features of interest. The scapulocoracoid of *REDACTED* is undistorted and complete. The scapula and coracoid are preserved as two separate yet articulated elements, but it is unclear if they were unfused or broken. The glenoid is located chiefly on the scapula, but partially on the coracoid. The scapula and coracoid are similar in length, with the coracoid being shorter (Table S1), and the distal end of the scapula is expanded and bulbous. A prominent flange is present on the distal coracoid, likely for the attachment of the *m. sternocoracoideus*. The sternum is incomplete, with just the cristospine and the most anterior portion of the sternal plate present. The cristospine is short and potential pneumatic foramina are present on the dorsal (internal) side of the base of the cristospine, where the sternal plate begins.

*REDACTED* falls out as a monofenestratan darwinopteran and sister taxon of *Kryptodrakon progenitor*. Darwinoptera is supported by five characters, including two diagnostic characters of Darwinoptera: phalanx two of pedal digit V with distinctive angular flexure at midlength, such that the distal half of the phalanx lies at 40–45° to the proximal half; and the scapula distal end is bulbous in shape. The other three features are synapomorphic reversals: ulna/tibia ratio 0.9–1.2; unguals of manus and

pes similar in size; and manus digit IV (wing finger) phalanx one shorter than length of tibiotarsus.

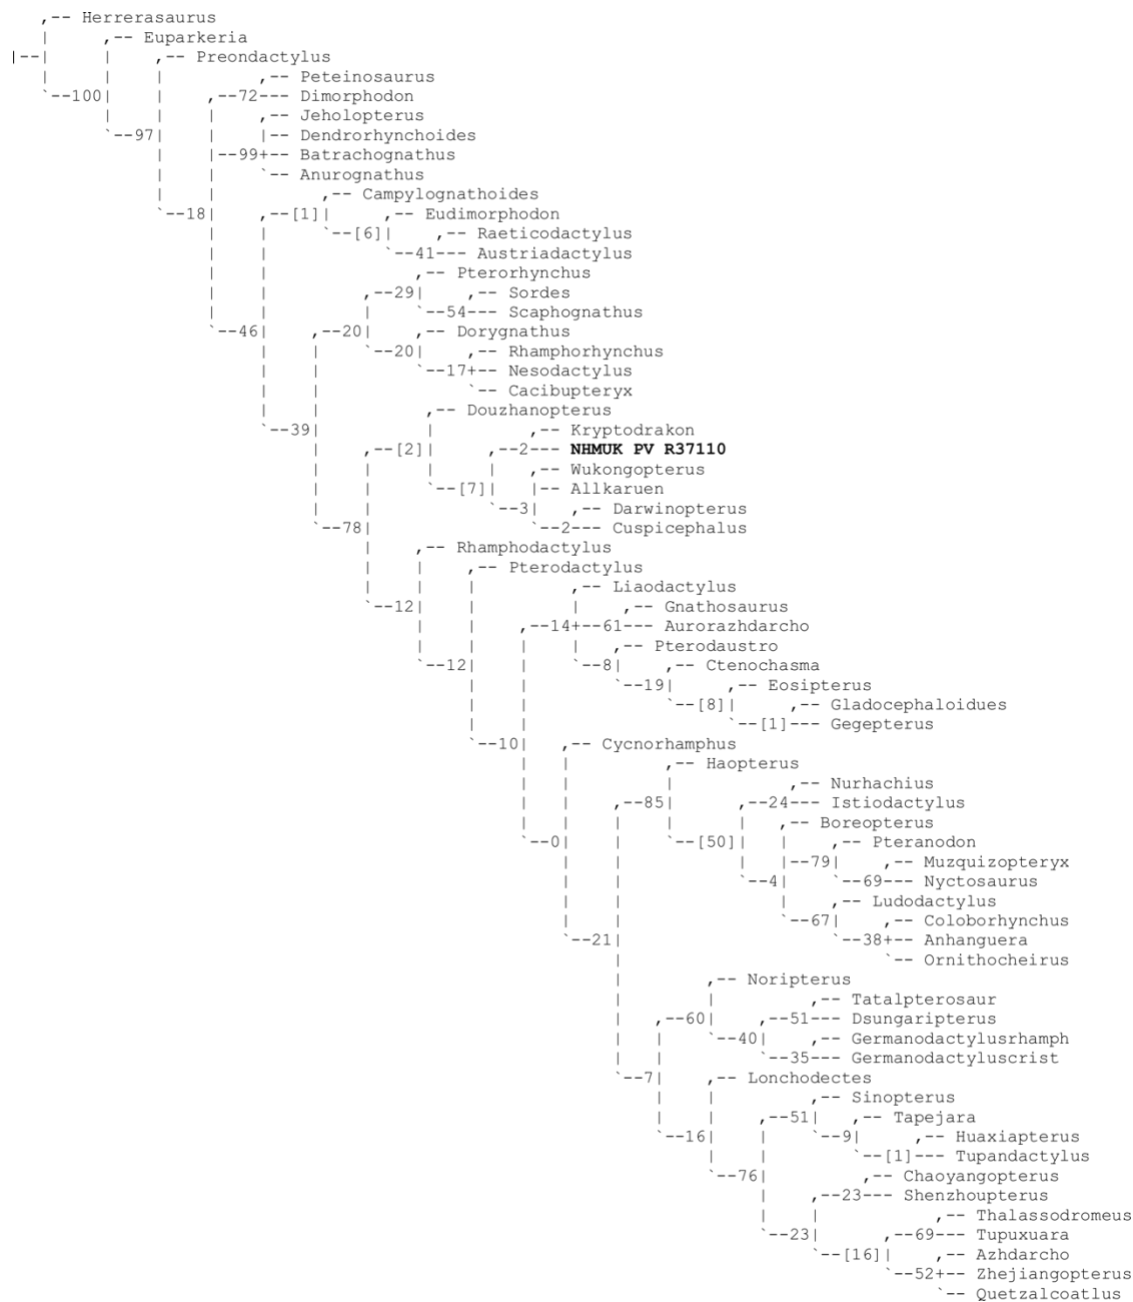

Figure 2: Majority rule consensus tree of 480 most parsimonious trees with bootstrap values.

## 5. Discussion

REDACTED from the Middle Jurassic of Skye, Scotland is important for several reasons. It provides new insights into key anatomical features of the shoulder girdle, manus and pes that help to unite several Jurassic pterosaurs in a single clade,

Darwinoptera, which is the sister group to Pterodactyloidea. It is also the most complete undisputed Middle Jurassic pterosaur and its age and phylogenetic position have a major impact on our knowledge of pterosaur evolutionary history. So-called ‘transitional’ pterosaurs, exhibiting a mosaic of features found in the long-tailed ‘rhamphorhynchoids’ and short-tailed pterodactyloids, were first recognised with the descriptions of *Darwinopterus* [3] and *Wukongopterus* [5], which occupied varied positions in the pterosaur tree. Together with pterodactyloids, these ‘transitional’ taxa form the clade Monofenestrata [3]. These discoveries led to the proposal of modular evolution for pterosaurs, with different areas of the skeleton evolving at different times and rates [3]. *Wukongopterus* was initially regarded as a very basal pterosaur [5] and its position has been difficult to constrain [6], and several other pterosaurs have been regarded as close relatives (included in Wukongopteridae [4]). Some more recent studies have recovered a monophyletic Wukongopteridae and Darwinoptera (Wukongopteridae + *Pterorhynchus wellnhoferi*) as basal monofenestratans [20].

Our results show that Darwinoptera also includes the latest Early Jurassic/earliest Middle Jurassic pterosaur *Allkaruen koi* (previously thought to be a sister taxon to Monofenestra [21]) and the Middle–Late Jurassic *Kryptodrakon progenitor* (formerly the oldest known pterodactyloid [20]). Darwinoptera also includes taxa previously described as ‘wukongopterids’ (although they do not form a monophyletic ‘wukongopterid’ clade), including *Douzhanopterus* [4], *Cuspicephalus* [22], *Darwinopterus* [3] and *Wukongopterus* [5].

The discovery of *REDACTED* and referral of *Allkaruen koi* to Monofenestrata also results in an earlier divergence of Monofenestra and Darwinoptera than thought previously. Formerly, the earliest confirmed monofenestratans were all from the

Tiaojishan Formation of China [3,4,23,24]. Although the exact age of the Tiaojishan Formation is debated, it appears to be latest Middle Jurassic (Callovian) or Late Jurassic (Oxfordian) in age, between 164–155 Ma [25–29]. Slightly younger than these are several Late Jurassic European non-pterodactyloid monofenestratans (*Cuspicephalus scarfi*, *Normannognathus wellnhoferi* [22], and the un-named ‘Painten pro-pterodactyloid’ [30]). Earlier monofenestratan records from the Bathonian Stonesfield Slate [31] are either incorrect or too fragmentary to include in phylogenetic analyses [15,20]. Our results therefore recalibrate the origin of Monofenestrata, pulling this event back to the early Middle Jurassic, approximately 8–10 million years earlier than previous estimates.

The identification of these early monofenestratans also raises questions about when and where Monofenestrata and Pterodactyloidea evolved, highlighting the patchiness of the pterosaur record at this important time in their evolution. Recovery of *Kryptodrakon progenitor* (Callovian: 162.7 Ma) as a darwinopteran, rather than the earliest pterodactyloid [20], restricts pterodactyloideans to the Late Jurassic onward, but extends the range of darwinopterans from the latest Early Jurassic to the Late Jurassic, and possibly into the Early Cretaceous by including *Wukongopterus* and *Kunpengopterus* within a monophyletic Darwinoptera. However, most darwinopterans are known from the latest Middle–Late Jurassic of China, leaving important gaps in the Early Jurassic. The earliest-known darwinopteran is Gondwanan [21], but our understanding of early pterosaur biogeography is limited [7].

This new tree topology also challenges our understanding of pterosaur evolution. When *Darwinopterus* was discovered, it was hailed as a transitional fossil, leading to the suggestion that pterosaurs underwent modular evolution with two

phases: first, from the basal ‘rhamphorhynchoid’ pterosaurs to basal monofenestratans; with the second phase to pterodactyls [3]. This was thought to explain the combination of features seen in *Darwinopterus*, which includes some primitive characters, such as a short wing metacarpal and a long tail, in combination with more derived features, such as a single nasoantorbital fenestra and longer skull. However, a monophyletic Darwinoptera that is the sister-taxon to Pterodactyloidea, combined with an increased number of basal monofenestratans with varying character combinations, suggests that pterosaur evolution may not have been modular, but more of a mosaic with different species evolving features at different times. Previous studies suggested that pterosaur evolution may have followed a mosaic pattern on a finer scale within anatomical units (e.g. the neurocranium and braincase) while retaining modular evolution at the level of major anatomical units (e.g. skull vs. body) [4,21]. However, we suggest that even at a gross anatomical level, modular evolution may not be tenable.

## 6. Conclusions

*REDACTED* is the first pterosaur to be named from Scotland and the most complete pterosaur to be found in the UK since Mary Anning discovered *Dimorphodon macronyx* in the early 1800s [32]. Its Middle Jurassic age, phylogenetic position and status as one of the most complete darwinopterans further elevate its significance, as it helps to shed light on when and how Monofenestrata, Darwinoptera and Pterodactyloidea evolved. Darwinoptera is shown to be a clade, not a grade, and to include pterosaurs from South America, Europe and Asia, demonstrating that it was diverse, widespread and persisted for at least 30 million years. Additional work remains to be carried out on Middle Jurassic pterosaurs, especially those from the

UK. Burgeoning new vertebrate fossil finds from the late Early–Middle Jurassic of Scotland [19], especially the Isle of Skye, including dinosaurs [17,33,34], crocodylomorphs [34], ichthyosaurs [35], turtles [18], and mammals [36], suggest that this area has high potential for revealing even more critical information on Middle Jurassic faunal evolution.

## **Acknowledgements**

We thank S. E. Evans for introducing PMB to the locality, J. Anquetin, S. Feerick and S. Moore-Fay for assistance with fieldwork, and Scottish Nature and the John Muir Trust for permissions and access to the locality. The Natural History Museum and the Palaeontographical Society provided funding. We thank M. Day for access to the specimen, T. Davies for CT scanning, D. Sykes for an early exploratory scan and D. Martill, M. O'Sullivan, and M. Witton for discussions.

## References

1. Witton MP. 2013 *Pterosaurs: natural history, evolution, anatomy*. Princeton, USA: Princeton University Press.
2. Barrett PM, Butler RJ, Edwards NP, Milner AR. 2008 Pterosaur distribution in time and space: an atlas. *Zitteliana* **B28**, 61–107.
3. Lü J, Unwin DM, Jin X, Liu Y, Ji Q. 2010 Evidence for modular evolution in a long-tailed pterosaur with a pterodactyloid skull. *Proc. R. Soc. B Biol. Sci.* **277**, 383–389.
4. Wang X, Jiang S, Zhang J, Cheng X, Yu X, Li Y, Wei G, Wang X. 2017 New evidence from China for the nature of the pterosaur evolutionary transition. *Sci. Rep.* **7**, 42763. (doi:10.1038/srep42763)
5. Wang X, Kellner AWA, Jiang S, Meng X. 2009 An unusual long-tailed pterosaur with elongated neck from western Liaoning of China. *An. Acad. Bras. Cienc.* **81**, 793–812.
6. Wang X, Kellner AWA, Jiang S, Cheng X, Meng X, Rodrigues T. 2010 New long-tailed pterosaurs (Wukongopteridae) from western Liaoning, China. *An. Acad. Bras. Cienc.* **82**, 1045–1062. (doi:10.1590/S0001-37652010000400024)
7. Upchurch P, Andres B, Butler RJ, Barrett PM. 2015 An analysis of pterosaurian biogeography: implications for the evolutionary history and fossil record quality of the first flying vertebrates. *Hist. Biol.* **27**, 697–717. (doi:10.1080/08912963.2014.939077)
8. Butler RJ, Barrett PM, Nowbath S, Upchurch P. 2009 Estimating the effects of sampling biases on pterosaur diversity patterns: implications for hypotheses of bird/pterosaur competitive replacement. *Paleobiology* **35**, 432–446.
9. Butler RJ, Benson RBJ, Barrett PM. 2013 Pterosaur diversity: untangling the

influence of sampling biases, Lagerstätten, and genuine biodiversity signals.

*Palaeogeogr. Palaeoclimatol. Palaeoecol.* **372**, 78–87.

10. Dean Christopher D, Mannion PD, Butler RJ. 2016 Preservational bias controls the fossil record of pterosaurs. *Palaeontology* **59**, 225–247.

11. Wellnhofer P. 1991 *The Illustrated Encyclopedia of Pterosaurs*. First Edit. Crescent Books.

12. Sullivan C, Wang Y, Hone DWE, Wang Y, Xu X, Zhang F. 2014 The vertebrates of the Jurassic Daohugou Biota of northeastern China. *J. Vertebr. Paleontol.* **34**, 243–280. (doi:10.1080/02724634.2013.787316)

13. Unwin DM. 2001 An overview of the pterosaur assemblage from the Cambridge Greensand (Cretaceous) of Eastern England. *Foss. Rec.* **4**, 189–221.

14. Zhou Z, Wang Y. 2010 Vertebrate diversity of the Jehol Biota as compared with other lagerstätten. *Sci. China Earth Sci.* **53**, 1894–1907. (doi:10.1007/s11430-010-4094-9)

15. O'Sullivan M, Martill D. 2018 Pterosauria of the Great Oolite Group (Middle Jurassic, Bathonian) of Oxfordshire and Gloucestershire, England. *Acta Palaeontol. Pol.* **63**. (doi:10.4202/app.00490.2018)

16. Liu Y-Q, Kuang H-W, Jiang X-J, Peng N, Xu H, Sun H-Y. 2012 Timing of the earliest known feathered dinosaurs and transitional pterosaurs older than the Jehol Biota. *Palaeogeogr. Palaeoclimatol. Palaeoecol.* **323–325**, 1–12. (doi:10.1016/J.PALAEO.2012.01.017)

17. Barrett PM. 2006 A sauropod dinosaur tooth from the Middle Jurassic of Skye, Scotland. *Trans. R. Soc. Edinb. Earth Sci.* **97**, 25–29. (doi:10.1017/S0263593300001383)

18. Anquetin J, Barrett PM, Jones ME., Moore-Fay S, Evans SE. 2009 A new stem turtle from the Middle Jurassic of Scotland: new insights into the evolution and palaeoecology of basal turtles. *Proc. R. Soc. B Biol. Sci.* **276**, 879–886. (doi:10.1098/rspb.2008.1429)
19. Panciroli E, Benson RBJ, Walsh S, Butler RJ, Castro TA, Jones MEH, Evans SE. 2020 Diverse vertebrate assemblage of the Kilmaluag Formation (Bathonian, Middle Jurassic) of Skye, Scotland. *Earth Environ. Sci. Trans. R. Soc. Edinburgh* **111**, 135–156.
20. Andres B, Clark J, Xu X. 2014 The earliest pterodactyloid and the origin of the group. *Curr. Biol.* **24**, 1011–1016.
21. Codorniu L, Carabajal AP, Pol D, Unwin D, Rahut OWM. 2016 A Jurassic pterosaur from Patagonia and the origin of the pterodactyloid neurocranium. *PeerJ* **4**, e2311.
22. Witton MP, O’Sullivan M, Martill DM. 2015 The relationships of *Cuspicephalus scarfi* Martill and Etches, 2013 and *Normannognathus wellnhoferi* Buffetaut et al., 1998 to other monofenestratan pterosaurs. *Contrib. to Zool.* **84**, 115–127.
23. Lü J. 2009 A New Non-Pterodactyloid Pterosaur from Qinglong County, Hebei Province of China. *Acta Geol. Sin.* **83**, 189–199. (doi:10.1111/j.1755-6724.2009.00062.x)
24. Lü J, Xu L, Chang H, Zhang X. 2011 A New Darwinopterid Pterosaur from the Middle Jurassic of Western Liaoning, Northeastern China and its Ecological Implications. *Acta Geol. Sin. - English Ed.* **85**, 507–514. (doi:10.1111/j.1755-6724.2011.00444.x)
25. Wang X, Zhou Z, He H, Jin F, Wang Y, Zhang J, Wang Y, Xu X, Zhang F. 2005 Stratigraphy and age of the Daohugou Bed in Ningcheng, Inner

- 314 Mongolia. *Chinese Sci. Bull.* **50**, 2369–2376. (doi:10.1007/bf03183749)
- 315 26. Liu Y, Liu Y, Ji S, Yang Z. 2006 U-Pb zircon age for the Daohugou Biota at  
316 Ningcheng of Inner Mongolia and comments on related issues. *Chinese Sci.*  
317 *Bull.* **51**, 2634–2644. (doi:10.1007/s11434-006-2165-2)
- 318 27. Liu Y, Liu Y, Zhang H. 2010 LA-ICPMS Zircon U-Pb Dating in the Jurassic  
319 Daohugou Beds and Correlative Strata in Ningcheng of Inner Mongolia. *Acta*  
320 *Geol. Sin. - English Ed.* **80**, 733–742. (doi:10.1111/j.1755-  
321 6724.2006.tb00296.x)
- 322 28. Zhang H, Wang M, Liu X. 2008 Constraints on the upper boundary age of the  
323 Tiaojishan Formation volcanic rocks in West Liaoning-North Hebei by LA-ICP-  
324 MS dating. *Chinese Sci. Bull.* **53**, 3574–3584. (doi:10.1007/s11434-008-0287-  
325 4)
- 326 29. Gao H-L, Zhao Y, Zhang S-H, Liu J, Ye H, Wang G-C, Liu J-M. 2019 Ages of  
327 Jurassic volcano-sedimentary strata in the Yanshan Fold-and-Thrust Belt and  
328 their implications for the coal-bearing strata of northern China. *Int. Geol. Rev.*  
329 **61**, 956–971. (doi:10.1080/00206814.2018.1481459)
- 330 30. Tischlinger H, Frey E. 2014 A new pterosaur with mosaic characters of basal  
331 and pterodactyloid Pterosauria from the Upper Kimmeridgian of Painten  
332 (Upper Palatinate, Germany). *Archaeopteryx* **31**, 1–13.
- 333 31. Buffetaut E, Jeffery P. 2012 A ctenochasmatid pterosaur from the Stonesfield  
334 Slate (Bathonian, Middle Jurassic) of Oxfordshire, England. *Geol. Mag.* **149**,  
335 552–556. (doi:10.1017/S0016756811001154)
- 336 32. W B. 1829 On the discovery of a new species of Pterodactyle in the Lias at  
337 Lyme Regis. *Trans. Geol. Soc. London* **3**, 217–222.
- 338 33. Clark NDL, Gavin P. 2016 New bathonian (Middle Jurassic) sauropod remains

- 339 from the valtos formation, Isle of Skye, Scotland. *Scottish J. Geol.* **52**, 71–75.  
 340 (doi:10.1144/sjg2015-010)
- 341 34. Wills S, Barrett PM, Walker A. 2014 New dinosaur and crocodylomorph  
 342 material from the middle Jurassic (Bathonian) Kilmaluag formation, Skye,  
 343 Scotland. *Scottish J. Geol.* **50**, 183–190. (doi:10.1144/sjg2014-005)
- 344 35. Brusatte SL *et al.* 2015 Ichthyosaurs from the jurassic of skye, scotland.  
 345 *Scottish J. Geol.* **51**, 43–55. (doi:10.1144/sjg2014-018)
- 346 36. Panciroli E, Benson RBJ, Luo ZX. 2019 The mandible and dentition of  
 347 *Borealestes serendipitus* (Docodontia) from the Middle Jurassic of Skye,  
 348 Scotland. *J. Vertebr. Paleontol.* **39**. (doi:10.1080/02724634.2019.1621884)  
 349
